# Burden of disease in Korea during 2000–10

K.S. Lee<sup>1</sup>, J.H. Park<sup>2</sup>

<sup>1</sup>Department of Preventive Medicine and Health Services Research Institute, College of Medicine, Yonsei University, Seoul, South Korea

<sup>2</sup>Department of Preventive Medicine and Samsung Biomedical Research Institute, School of Medicine, Sungkyunkwan University, 2066 Seobu-ro, Jangan-gu, Suwon, Gyeonggi-do 440-746, South Korea

Address correspondence to Jae-Hyun Park, E-mail: pjachyun@skku.edu

## ABSTRACT

**Background** This study estimates the burden of disease in Korea during 2000–10, using disability-adjusted life years (DALYs).

**Methods** DALYs are the sum of years of life lost from mortality and years of life lost from disability. DALYs for 24 major diseases in 2000, 2005 and 2010 Korea were calculated based on the Global Burden of Disease Study method.

**Results** As in other advanced nations, the burden of disease in Korea is characterized by an increasing importance of cancer, unipolar depression and ischemic heart disease (1681, 1508 and 562 person-years for Year 2010 in terms of DALYs per 10 000, respectively). At the same time, unipolar depression, liver cirrhosis and mental and behavioral disorder due to alcohol use (1508, 323 and 535 person-years for 2010, respectively) became much more common in Korea than in other advanced nations.

**Conclusions** The burden of disease in Korea follows the pattern of other advanced nations in general but also registers some unique characteristics affected by the nation's distinctive epidemiological and sociocultural contexts, e.g. rapid economic growth and dramatic social transition without appropriate policy response. Korea's health and welfare policy might need to incorporate these special conditions for the effective reduction of its disease burden.

**Keywords** burden of disease, disability-adjusted life years, incidence, mortality, prevention

## Introduction

In the past four decades, South Korea (hereafter Korea) achieved a rapid economic growth, experiencing the dramatic rise of chronic diseases.<sup>1,2</sup> The incidence of cancer registered a rapid expansion in Korea, with an annual growth of 3.1% from 1999 to 2008,<sup>1</sup> while the prevalence of diabetes in the nation has increased from 1.5% in 1970 to 9.9% during 2007–09.<sup>2</sup> As chronic diseases are getting more common in Korea, it is becoming more essential to use a single measure of population health combining morbidity with mortality and reflecting the quality of patient life in the nation. Also, midst Korea's sudden epidemiological and sociocultural transitions addressed above, the reliable estimation of its disease burden is getting more important for setting up its proprieties regarding disease control and prevention. But existing research on the burden of disease centers on either incidence or mortality, which fails to reflect the quality of life and the burden of disease as a single collective measure.

Anticipating these issues, the World Health Organization and the Global Burden of Disease (GBD) Study Group have since 1993 introduced disability-adjusted life years (DALYs), a single measure of population health incorporating both mortality and morbidity.<sup>3,4</sup> DALYs combines the years of life lost (YLLs: the quantity of premature death or fatal health outcomes) and the years lived with disability (YLDs: the quality of disabled life or non-fatal health outcomes). This measure shows comparability across nations and regions, a characteristic that conventional qualitative indicators, such as the SF-36 (i.e. a short-form survey measure of patient health introduced by the RAND Corporation to reflect the quality of patient life), are currently lacking. Also, it can serve as a basis

K.S. Lee, Research Assistant Professor in Preventive Medicine

J.H. Park, Associate Professor in Preventive Medicine

of cost-effectiveness analysis, aiding in the rational, efficient utilization of limited healthcare resources.<sup>3,4</sup>

Based on national health insurance claims data, the Korea Ministry of Health and Welfare<sup>5</sup> and Yoon<sup>6</sup> replicated the GBD analysis in a Korean context, estimating and ranking the DALYs of major diseases in Korea for Year 2002 (or Y2002 hereafter) (e.g. cancer, diabetes mellitus and cerebrovascular disease as top three diseases). Yoon's follow-up study<sup>7</sup> updated his old results, reaching a similar conclusion on three leading diseases in Korea for Y2007 (i.e. cancer, cerebrovascular disease and diabetes mellitus). As these studies admit, however, the reliability of national health insurance claims data is questionable for physicians' over-report, and the existing results might need a cross-examination from the national survey data on patients. Moreover, these studies might underestimate the incidence and prevalence of mental disorder, whose accurate estimation requires direct interviews. In fact, mental diseases prevalent in developed countries, e.g. unipolar depression, are becoming more common in Korea, a nation characterized by rapid, constant westernization in demographic, socioeconomic, health-behavioral and medical-technological aspects in the past four decades.<sup>8,9</sup> The prevalence of depressive symptoms for elders in Korea registered a jump from 9.1% in 1989 to 16.6% in 2005,<sup>8</sup> whereas the nation's incidence of suicide showed an annual growth of 8.0% from 1995 to 2006.<sup>9</sup> In this context, calculating the burden of mental disorder might need reliable data from direct interviews, and a new calculation is required on the burden of disease in Korea during the period 2000–10. For this reason, this research involves the estimation of DALYs for major diseases in Korea during 2000–10.

Methods

For estimating DALYs for 24 major diseases (Table 1) in Korea during 2000–10, this study improves the GBD method with the incidence–prevalence–mortality (IPM) model.<sup>10,11</sup> The estimation of YLDs for a disease requires estimating the average age of onset and the expected duration of disability based on the DisModII program,<sup>12</sup> which in turn requires the estimation of mortality, incidence and prevalence (DisModII, based on a set of differential equations, and the IPM model, based on a set of difference equations, both are designed to test data consistency and supplement incomplete data on the mortality, incidence and prevalence of a disease). Usually, however, only mortality and prevalence data are available in reality. In order to calculate the YLDs of a disease without incidence data, the GBD Study Group normally uses the YLLs values from the mortality data, assuming that the YLDs/YLLs ratio stays constant during the study period. However, empirical

Table 1 Diseases, data sources and years of prevalence data available

| Disease            | ICD-10 code | Data source | Years of prevalence data available |
|--------------------|-------------|-------------|------------------------------------|
| Cancer             | C00–C96     | 13          | 2000–10                            |
| Tuberculosis       | A15–A19     | 37          | 2000–10 (incidence data instead)   |
| Viral hepatitis    | B15–B19     | 17          | 2001, 2005, 2007–10                |
| Anemia             | D50         | 17          | 2001, 2005, 2007–10                |
| Diabetes mellitus  | E10–E14     | 17,38       | 2000–02, 2005, 2007–10             |
| MBDA               | F10         | 18,19       | 2006, 2010                         |
| Schizophrenia      | F20–F29     | 18,19       | 2006, 2010                         |
| U. depression      | F30–F39     | 18,19       | 2006, 2010                         |
| Parkinson          | G20         | 38,39       | 2000–02, 2007                      |
| Alzheimer          | G30         | 20,38       | 2000–02, 2005                      |
| Multiple sclerosis | G35         | 38,40       | 2000–02, 2005                      |
| Epilepsy           | G40–G41     | 38,41       | 2000–02, 2007                      |
| Cataract           | H25–H28     | 17          | 2001, 2007                         |
| Glaucoma           | H40–H42     | 38,42       | 2000–02, 2009                      |
| Otitis media       | H65–H75     | 17,38       | 2000–02, 2007, 2009–10             |
| IHD                | I20–I25     | 17          | 2001, 2008–10                      |
| CVD                | I60–I69     | 17          | 2001, 2005, 2007–10                |
| AURI               | J00–J06     | 17          | 2001, 2008–10                      |
| COPD               | J40–J44     | 17          | 2001, 2007–10                      |
| Peptic ulcer       | K25–K27     | 17          | 2001, 2009                         |
| Liver cirrhosis    | K70         | 17          | 2007–10                            |
| Arthrosis          | M05–M19     | 17          | 2001, 2005, 2007–08, 2010          |
| Glomerular disease | N00–N08     | 43          | 2000–02, 2006                      |
| Renal failure      | N17–N19     | 43          | 2000–02, 2006                      |

AURI, acute upper respiratory infection; CVD, cerebrovascular disease; IHD, ischemic heart disease; U. depression, unipolar depression; COPD, chronic obstructive pulmonary disease; MBDA, mental and behavioral disorder due to alcohol use.

results show that the YLDs/YLLs ratio for a major disease (such as cancer) is rising over time.<sup>13</sup> It might be better to estimate the incidence from the prevalence (and mortality) based on a reliable method (e.g. the IPM model) then to estimate the average age of onset, the expected duration of disability, and the YLDs. In this context, this work calculates the YLDs of a major disease by (i) calculating the disease-specific prevalence rate for missing data from existing literature, (iii) deriving the disease-specific incidence rate based on the IPM model and (iii) calculating the average age at onset and the expected duration of disability based on DisModII.

Table 1 shows diseases, data sources and years of prevalence data available. Twenty-four diseases listed in the table were chosen for (i) their great incidence, prevalence or DALYs in Korea for Y2002/Y2007 (compared with Australia for Y2003,

Spain for Y2008 and a high-income nation on average for Y2004)<sup>5–7,14–16</sup> and (ii) the stability of their prevalence data available (given that the incidence was estimated from the prevalence (and mortality) data based on a method addressed below). The Korea National Health and Nutrition Examination Survey (KNHANES) data<sup>17</sup> are considered to be a gold standard for Korea's prevalence data. The survey involves a clustered random sampling with a proportional allocation in each of 30 clusters across the nation so that the population and the sample are consistent with each other in demographic composition. The survey on an item of 'morbidity' was done by direct interviews in a traveling check-up center for 24 871 participants (with the participation rate of 78.4% and the non-response rate of 0.79% during 2007–09). The survey allowed this study to estimate the incidence of a disease from its prevalence and mortality, an advantage over the previous studies on Australia for Y2003, Spain for Y2008 and the world for Y2004 (which estimated the incidence/YLDs of a disease only from its mortality/YLLs with a simple assumption on the (constant) ratio of incidence to mortality or YLDs to YLLs). But the survey information is missing for some diseases. For this reason, other reliable sources listed in the table were used when the KNHANES data were not available for certain diseases. Indeed, the data from Cho's studies of mental diseases (e.g. mental and behavioral disorder due to alcohol, schizophrenia, unipolar depression and Alzheimer)<sup>18–20</sup> were used in this study, given that his studies were designed specifically for mental diseases and his interviews were more focused and intensive than the KNHANES). To estimate the YLLs of the major diseases in Korea for Y2000, Y2005 and Y2010, this study used the GBD methods. YLLs are years of life lost because of premature death from a specific disease. The basic formula is  $YLL = m \times l$  where  $m$  is the number of death from a particular disease and  $l$  the standard life expectancy at the age of death (this formula is modified by social values including the discount rate ( $r$ )/age-weighting constants ( $\beta$ ,  $K$  and  $C$ ) so that YLLs are greater and the state of health is valued more for the present/the young than for the future/the old).<sup>21</sup> The average age of death for an age cohort by gender was assumed to be an average age of that cohort, e.g. 2, 7, ..., 77 for the 0–4, 5–9, ..., 75– cohort, respectively. The discount rate ( $r$ ) and the age-weighting constants ( $\beta$ ,  $K$  and  $C$ ) took the GBD values, i.e. 0.03, 0.04, 1.00 and 0.1658, respectively. The data on standard life expectancies at the age of death and disease-specific mortality rates for each age cohort by gender in 2000, 2005 and 2010 came from Statistics Korea, 'the cause of death' denoting 'the first cause of death' here.<sup>22</sup>

For estimating the YLDs of the major diseases in Korea for Y2000, Y2005 and Y2010, this research improved the GBD approach with the IPM model. YLDs are years of life

lived with disability from a specific disease. The basic formula is  $YLD = i \times w \times l$  where  $i$  is the number of incidence for a particular disease,  $w$  a disability weight/severity and  $l$  the expected duration of disability from onset to remission/death (this formula is modified by social values including the discount rate ( $r$ )/age-weighting constants ( $\beta$ ,  $K$  and  $C$ ) so that YLDs are greater and the state of health is valued more for the present/the young than for the future/the old).<sup>21</sup> The average age at onset for each age cohort by gender in 2000, 2005 or 2010 was estimated based on DisModII after (i) data on disease-specific mortality rates, population sizes and total mortality rates for each age cohort by gender during 2000–10 were collected from Statistics Korea,<sup>22</sup> (ii) data on disease-specific prevalence rates for each age cohort by gender were gathered from the data sources listed in Table 1, (iii) disease-specific prevalence rates for each age cohort by gender missing in some years were estimated based on the available data with an assumption of linear relationship between the logarithm of the prevalence rate and time<sup>23</sup> and (iv) a disease-specific incidence rate for each age cohort by gender in a given year ( $i_{t-1}$ ) (during the period 2000–10) was derived from the disease-specific mortality and prevalence rates in the same year ( $m_{t-1}$ ,  $p_{t-1}$ ) and the disease-specific prevalence rate in the following year ( $p_t$ ) (IPM model:  $i_{t-1} = [(p_t - p_{t-1}) + (1 - p_t)m_{t-1}]/(1 - p_{t-1})$ ). The discount rate ( $r$ ) and the age-weighting constants ( $\beta$ ,  $K$  and  $C$ ) took the GBD values, i.e. 0.03, 0.04, 1.00, 0.1658, respectively. The expected duration of disability for each age cohort by gender in 2000, 2005 or 2010 was also estimated based on DisModII. Disability weights for major diseases were from Do's 2004 results.<sup>24</sup> Once YLLs and YLDs were estimated based on the methods above, DALYs were calculated as the sum of the two measures. Indeed, the YLLs, YLDs and DALYs of cancer in Korea for Y2000, Y2005 and Y2010, respectively, came from Park's 2013 outcomes.<sup>13</sup>

## Results

Table 2 describes the trends of prevalence, mortality and incidence (per 10 000) for 10 major diseases of Korean men and women in 2010 values during 2000–10. Table 3 presents the trends of YLLs, YLDs and DALYs (per 10 000) for 10 or all major diseases of Korean men and women in 2010 values during the period. Indeed, Fig. 1 displays the trend of DALYs (per 10 000) for 10 major diseases of the entire Korean population in 2010 values during the period. The rank order in YLLs (e.g. cancer, cerebrovascular disease and ischemic heart disease) was almost identical to that in mortality for both Korean men and women during 2000–10. Relative falls of cerebrovascular disease, diabetes mellitus and

**Table 2** Incidence, prevalence and mortality per 100 000 for Korean men and women in years 2000, 2005 and 2010 (estimated values for missing data)

| 2010       | Men               |      |        |        | Women             |        |        |        |
|------------|-------------------|------|--------|--------|-------------------|--------|--------|--------|
| Rank       | Disease           | 2000 | 2005   | 2010   | Disease           | 2000   | 2005   | 2010   |
| Incidence  |                   |      |        |        |                   |        |        |        |
| 1          | Cataract          | 177  | 763    | 1065   | AURI              | 747    | 1244   | 625    |
| 2          | Peptic ulcer      | 323  | 467    | 679    | Cancer            | 174    | 261    | 362    |
| 3          | Cancer            | 232  | 311    | 392    | Arthrosis         | 503    | 368    | 331    |
| 4          | Glaucoma          | 32   | 73     | 140    | U. depression     | 168    | 225    | 303    |
| 5          | IHD               | 97   | 215    | 97     | Cataract          | 297    | 482    | 224    |
| 6          | COPD              | 91   | 309    | 90     | COPD              | 131    | 119    | 108    |
| 7          | Tuberculosis      | 79   | 81     | 84     | IHD               | 98     | 180    | 106    |
| 8          | Liver cirrhosis   | 13   | 44     | 82     | Alzheimer         | 4      | 16     | 73     |
| 9          | Parkinson         | 2    | 20     | 61     | Diabetes mellitus | 111    | 32     | 66     |
| 10         | U. depression     | 43   | 48     | 54     | Tuberculosis      | 58     | 54     | 65     |
| Prevalence |                   |      |        |        |                   |        |        |        |
| 1          | AURI              | 4527 | 13 935 | 33 400 | AURI              | 4129   | 12 575 | 31 600 |
| 2          | COPD              | 1173 | 5898   | 19 600 | Arthrosis         | 11 255 | 17 500 | 25 800 |
| 3          | Diabetes mellitus | 2712 | 7100   | 11 300 | Cataract          | 1022   | 3985   | 13 300 |
| 4          | Peptic ulcer      | 4265 | 6049   | 8579   | Anemia            | 2946   | 9500   | 12 600 |
| 5          | Cataract          | 591  | 2343   | 8200   | Diabetes mellitus | 2439   | 5800   | 9000   |
| 6          | Arthrosis         | 3521 | 6000   | 6600   | COPD              | 1015   | 3174   | 7000   |
| 7          | CVD               | 4575 | 5000   | 3700   | Peptic ulcer      | 6338   | 5494   | 4762   |
| 8          | MBDA              | 5104 | 4166   | 3400   | U. depression     | 2054   | 2972   | 4300   |
| 9          | Viral hepatitis   | 1526 | 4400   | 2700   | Otitis media      | 431    | 1218   | 3800   |
| 10         | Otitis media      | 503  | 1224   | 2600   | Viral hepatitis   | 692    | 3000   | 3200   |
| Mortality  |                   |      |        |        |                   |        |        |        |
| 1          | Cancer            | 150  | 164    | 173    | Cancer            | 83     | 94     | 100    |
| 2          | CVD               | 70   | 62     | 52     | CVD               | 78     | 68     | 55     |
| 3          | IHD               | 24   | 29     | 29     | IHD               | 19     | 27     | 25     |
| 4          | Diabetes Mellitus | 23   | 25     | 21     | Diabetes mellitus | 23     | 24     | 21     |
| 5          | COPD              | 9    | 14     | 14     | Renal failure     | 5      | 5      | 8      |
| 6          | Liver cirrhosis   | 6    | 14     | 13     | COPD              | 5      | 7      | 6      |
| 7          | Renal failure     | 5    | 6      | 8      | Parkinson         | 1      | 3      | 4      |
| 8          | Tuberculosis      | 10   | 8      | 6      | Tuberculosis      | 4      | 4      | 3      |
| 9          | Parkinson         | 1    | 2      | 4      | Viral hepatitis   | 1      | 1      | 2      |
| 10         | MBDA              | 5    | 4      | 3      | Liver cirrhosis   | 0      | 1      | 1      |

AURI, acute upper respiratory infection; CVD, cerebrovascular disease; IHD, ischemic heart disease; U. depression, unipolar depression; COPD, chronic obstructive pulmonary disease; MBDA, mental and behavioral disorder due to alcohol use.

tuberculosis (e.g. from 559/70, 205/23 and 106/10 to 391/52, 173/21 and 59/6 in men's YLLs/mortality), respectively, were contrasted with the opposite movements of cancer, liver cirrhosis and viral hepatitis (e.g. from 1220/150, 83/6 and 15/1 to 1377/173, 192/13 and 35/3 in men's YLLs/mortality), respectively, in both measures for both groups during the period. The pattern of YLDs followed that of incidence for both Korean men and women during 2000–10, albeit with some gaps in rank order between the two indicators. Acute upper respiratory infection, cataract, peptic ulcer and arthrosis

(top five diseases in incidence for either Korean men or women during 2000–10) moved down or entirely disappeared in the top-10 list in YLDs during the period. On the contrary, unipolar depression, ischemic heart disease and mental and behavioral disorder due to alcohol use (MBDA), which occupied the lower echelon of the top-10 list in incidence or did not make the list at all during 2000–10, emerged to constitute the core of top five diseases in YLDs together with cancer in the latest year. In terms of DALYs (per 10 000) for the entire population during 2000–10, unipolar

**Table 3** YLL, YLD and DALY per 100 000 for Korean men and women in years 2000, 2005 and 2010

| 2010 | Men                |      |      |      | Women              |      |      |      |
|------|--------------------|------|------|------|--------------------|------|------|------|
| Rank | Disease            | 2000 | 2005 | 2010 | Disease            | 2000 | 2005 | 2010 |
| YLL  |                    |      |      |      |                    |      |      |      |
| 1    | Cancer             | 1220 | 1375 | 1377 | Cancer             | 802  | 846  | 863  |
| 2    | CVD                | 559  | 480  | 391  | CVD                | 543  | 457  | 372  |
| 3    | IHD                | 234  | 259  | 246  | IHD                | 134  | 169  | 157  |
| 4    | Liver cirrhosis    | 83   | 199  | 192  | Diabetes mellitus  | 164  | 175  | 137  |
| 5    | Diabetes mellitus  | 205  | 220  | 173  | Renal failure      | 42   | 43   | 58   |
| 6    | COPD               | 50   | 74   | 77   | COPD               | 28   | 36   | 33   |
| 7    | Renal failure      | 46   | 50   | 59   | Parkinson          | 8    | 15   | 26   |
| 8    | Tuberculosis       | 106  | 81   | 59   | Liver cirrhosis    | 5    | 20   | 25   |
| 9    | MBDA               | 50   | 58   | 43   | Tuberculosis       | 39   | 33   | 23   |
| 10   | Viral hepatitis    | 15   | 31   | 35   | Viral hepatitis    | 7    | 15   | 17   |
| YLD  |                    |      |      |      |                    |      |      |      |
| 1    | U. depression      | 241  | 421  | 704  | U. depression      | 613  | 1119 | 2316 |
| 2    | MBDA               | 430  | 517  | 634  | Cancer             | 97   | 221  | 543  |
| 3    | Cancer             | 96   | 232  | 579  | Otitis media       | 384  | 171  | 493  |
| 4    | Glaucoma           | 159  | 224  | 422  | IHD                | 215  | 256  | 419  |
| 5    | IHD                | 236  | 400  | 302  | MBDA               | 160  | 265  | 389  |
| 6    | Liver cirrhosis    | 15   | 59   | 240  | Cataract           | 204  | 283  | 276  |
| 7    | Cataract           | 109  | 308  | 159  | COPD               | 160  | 355  | 271  |
| 8    | Glomerular disease | 78   | 68   | 129  | Alzheimer          | 5    | 28   | 202  |
| 9    | Peptic ulcer       | 54   | 75   | 106  | Liver cirrhosis    | 4    | 24   | 187  |
| 10   | Diabetes mellitus  | 446  | 28   | 101  | Schizophrenia      | 16   | 51   | 179  |
| DALY |                    |      |      |      |                    |      |      |      |
| 1    | Cancer             | 1316 | 1606 | 1956 | U. depression      | 614  | 1119 | 2316 |
| 2    | U. depression      | 241  | 421  | 704  | Cancer             | 899  | 1067 | 1405 |
| 3    | MBDA               | 479  | 575  | 677  | IHD                | 349  | 425  | 576  |
| 4    | IHD                | 470  | 659  | 548  | Otitis media       | 384  | 171  | 493  |
| 5    | Liver cirrhosis    | 98   | 258  | 433  | MBDA               | 162  | 268  | 392  |
| 6    | Glaucoma           | 159  | 224  | 422  | CVD                | 549  | 526  | 383  |
| 7    | CVD                | 571  | 489  | 417  | COPD               | 188  | 392  | 304  |
| 8    | Diabetes mellitus  | 651  | 248  | 274  | Cataract           | 204  | 283  | 276  |
| 9    | COPD               | 104  | 517  | 166  | Diabetes mellitus  | 310  | 386  | 276  |
| 10   | Cataract           | 109  | 308  | 159  | Liver cirrhosis    | 9    | 45   | 212  |
| 11   | Glomerular disease | 80   | 68   | 129  | Alzheimer          | 5    | 28   | 202  |
| 12   | Peptic ulcer       | 54   | 75   | 106  | Schizophrenia      | 21   | 53   | 181  |
| 13   | Otitis media       | 316  | 144  | 96   | Renal failure      | 52   | 92   | 166  |
| 14   | Parkinson          | 13   | 38   | 94   | Glaucoma           | 209  | 119  | 136  |
| 15   | Renal failure      | 63   | 56   | 80   | Anemia             | 28   | 121  | 117  |
| 16   | Epilepsy           | 32   | 67   | 78   | Epilepsy           | 30   | 61   | 72   |
| 17   | Tuberculosis       | 122  | 96   | 75   | Arthrosis          | 128  | 102  | 71   |
| 18   | Arthrosis          | 152  | 115  | 61   | Parkinson          | 17   | 27   | 48   |
| 19   | Alzheimer          | 3    | 12   | 47   | Tuberculosis       | 50   | 43   | 34   |
| 20   | Viral hepatitis    | 15   | 32   | 36   | Viral hepatitis    | 7    | 15   | 20   |
| 21   | Anemia             | 16   | 18   | 19   | Glomerular disease | 44   | 4    | 17   |
| 22   | Schizophrenia      | 10   | 5    | 8    | Peptic ulcer       | 0    | 0    | 2    |
| 23   | Multiple sclerosis | 1    | 4    | 7    | Multiple sclerosis | 2    | 2    | 1    |

Continued

Continued

Table 3 Continued

| 2010 | Men     |      |      |      | Women   |      |      |      |
|------|---------|------|------|------|---------|------|------|------|
| Rank | Disease | 2000 | 2005 | 2010 | Disease | 2000 | 2005 | 2010 |
| 24   | AURI    | 1    | 1    | 1    | AURI    | 1    | 1    | 1    |
|      | Total   | 5077 | 6037 | 6593 | Total   | 4261 | 5349 | 7704 |

AURI, acute upper respiratory infection; COPD, chronic obstructive pulmonary disease; CVD, cerebrovascular disease; IHD, ischemic heart disease; MBDA, mental and behavioral disorder due to alcohol use; U. depression, unipolar depression.

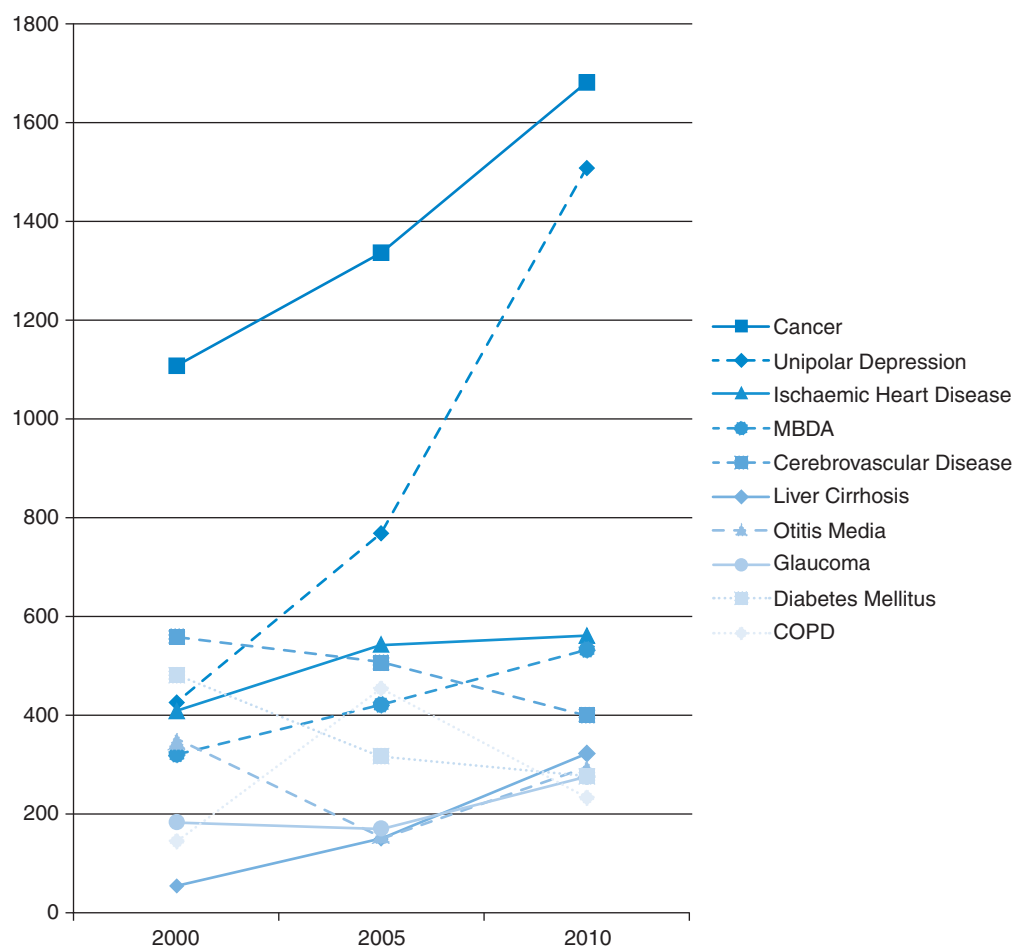

Figure 1 DALY per 100 000 for all population in 2000, 2005 and 2010 Korea. Note: COPD, chronic obstructive pulmonary disease; MBDA, mental and behavioral disorder due to alcohol use.

depression and ischemic heart disease became more significant, constituting the top three together with cancer in the latest year (i.e. from 427, 410 and 1109 in Year 2000 to 1508, 562 and 1681 in Year 2010, respectively). Specifically, a differential between cancer and unipolar depression almost disappeared during the period, i.e. 1109 versus 427 in 2000 and 1681 versus 1508 in 2010, respectively. The relative position

of diabetes mellitus declined from the 4th (482) to the 9th (275), whereas that of MBDA/liver cirrhosis went up from the 8th/16th (322/54) to the 4th/6th (535/323) during 2000–10. Indeed, cerebrovascular disease, otitis media, glaucoma and chronic obstructive pulmonary disease were resilient during the period (i.e. from 560, 350, 184 and 146 in Year 2000 to 400, 294, 279 and 235 in Year 2010, respectively). In



addition, gender differences can be noted for diseases outside of the top-10 list in terms of DALYs per 10 000. For example, glomerular disease and peptic ulcer were more significant for men (129/the 11th and 106/the 12th) than for women (17/the 21st and 2/the 22nd) in Year 2010, and vice versa for Alzheimer and schizophrenia (47/the 19th and 8/the 22nd for men versus 202/the 11th and 181/the 12th for women).

## Discussion

### Main findings of this study

The findings on the burden of disease in Korea during the period 2000–10 can be summarized as the following. Unipolar depression and ischemic heart disease became more significant in DALYs during 2000–10, constituting the top three together with cancer in the latest year. The relative fall of diabetes mellitus was contrasted with the relative rises of liver cirrhosis and MBDA during the period. Cerebrovascular disease, otitis media, glaucoma and chronic obstructive pulmonary disease were resilient during 2000–10. Indeed, gender differences can be noted for diseases outside of the top-10 list in terms of DALYs per 100 000. For example, glomerular disease and peptic ulcer were more significant for men than for women in Year 2010, and vice versa for Alzheimer and schizophrenia. Overall, the burden of disease in Korea is characterized by an increasing importance of cancer, unipolar depression and ischemic heart disease (i.e. 1681, 1508 and 562 person-years for Year 2010 in terms of DALYs per 100 000). At the same time, unipolar depression, liver cirrhosis and MBDA became very common in Korea (1508, 323 and 535 person-years for 2010).

### What is already known on this topic

The existing literature indicates that the burden of disease in an advanced nation centers on cancer, unipolar depression and ischemic heart disease. In terms of DALYs per 10 000 for the entire population, the three diseases ranked the top three in Australia for Y2003 (2567, 965 and 1325) and the top four in Spain for Y2008 (1760, 940 and 470).<sup>14,15</sup> These results agreed with global statistics in 2004. The same group constituted the top three in DALYs per 10 000 for the entire population in a high-income nation on average for Y2004 (1862, 1024 and 788).<sup>16</sup> Indeed, otitis media/chronic obstructive pulmonary disease occupied the lower echelon of the top-10 list for the same measure in the high-income nations, e.g. the 8th (326)/the 7th (436) in Australia for Y2003, the 5th (450)/the 10th (260) in Spain for Y2008 and the 7th (430)/the 8th (379) in the high-income nation on average for Y2004.<sup>14–16</sup> But little

explanation has been done on national variations in terms of disease burden in the developed world.

### What this study adds

This study ameliorated the GBD approach, using more realistic assumptions and doing more accurate estimation of YLDs based on the IPM model. In order to calculate the YLDs of a disease without incidence data, the GBD Study Group normally uses the YLLs values from the mortality data, assuming that the YLDs/YLLs ratio stays constant during the study period. However, empirical results show that the YLDs/YLLs ratio for a major disease (such as cancer) is rising over time.<sup>13</sup> In this context, this study estimated the incidence from the prevalence (and mortality) based on the IPM model to estimate the average age of onset, the expected duration of disability and the YLDs. This study also managed to construct time-series data on prevalence, mortality/YLLs, incidence/YLDs and DALYs for major diseases in Korea for Y2000, Y2005 and Y2010.

Based on these approaches, this study demonstrates that Korea is converging with other advanced nations in disease burden. In terms of DALYs per 100 000 for the entire population, cancer, unipolar depression and ischemic heart disease (which ranked the top three in Australia for Y2003, the top four in Spain for Y2008 and the top three in a high-income nation on average for Y2004) made the top three in Korea for Y2010 (1681, 1508 and 562 person-years). This similarity remained intact in the lower half of the top-10 list for the same measure as otitis media/chronic obstructive pulmonary disease (which ranked between the 5th and the 8th in the nations listed above) held the 7th/the 10th positions in Korea for Y2010 (294/235 person-years). Korea's convergence with other advanced nations in disease burden might reflect their convergence in living standards, the age structure, health behavior and medical technology during the past four decades. A rise of Korea's gross domestic product (GDP) per capita relative to the Organization for Economic Cooperation and Development (OECD) average [e.g. from 0.28 to 0.86 (PPP, current international dollars) during 1980–2011<sup>25</sup>] has been accompanied by a growing proportion of the old population, a decline of physical activity, a rise of animal food consumption and an increase of body weight. Korea's percentage of the population aging 60 or older, which was 15% in 2009, is likely to reach 21% in 2018, the figure of the developed regions in 2009.<sup>22,26</sup> Korea's share of agriculture workforce—involving more intensive physical activity than industry/services workforce—dropped from 50.7 to 14.6 during 1969–93.<sup>27</sup> Meanwhile, the Korean percentage of energy intake from animal food went up from 5.1 to 14.2, with the BMI of

male/female adolescents 17 years old jumping up from 20.8/20.5 to 21.4 (kgm<sup>-2</sup>).<sup>27</sup> This 'modified (or westernized)' dietary pattern became more robust among younger and metropolitan residents with more education and higher income in Korea during 1998–2005.<sup>28</sup> Korea's convergence with other developed nations has been apparent in medical technology as well, especially in selective, customized disease treatment.<sup>29</sup> These economic, demographic, behavioral and technological changes might have aided in shifting the centrality of disease from acute, physical to chronic, mental components in Korea.

Unlike Australia, Spain and other advanced nations during 2000–10, however, Korea has been characterized by unusually rapid emergences of unipolar depression, liver cirrhosis and MBDA during the period according to the results of this work. The share of unipolar depression in total DALYs was 0.16 in Korea for Y2010, twice as high as in Australia for Y2003 (0.07), Spain for Y2008 (0.08) or a high-income nation on average for Y2004 (0.08). In terms of DALYs per 100 000 for the entire population, in addition, liver cirrhosis and MBDA (which ranked the 16th and the 8th in 2000) came to hold the 6th and the 4th positions in 2010. These results suggest that the burden of disease in Korea follows the pattern of other advanced nations in general but also registers some unique characteristics affected by Korea's distinctive epidemiological, historical and sociocultural contexts from other advanced nations, e.g. higher infection of hepatitis B virus,<sup>30</sup> higher per-capita consumption of alcohol,<sup>31</sup> and, above all, more rapid economic growth and more dramatic social change but no appropriate response in health and welfare policy.<sup>32–35</sup> Korea achieved the most rapid economic expansion in the post-1970 world (i.e. the highest average annual growth rate in GDP per capita during 1970–2009, 111%, which is higher than China's 90% during 1980–2009 and five times as high as OECD's 21% during 1970–2009).<sup>32</sup> This rapid economic development was accompanied by dramatic social transitions such as an abrupt rise of the single/nuclear family (i.e. from 8.9%/16.9 to 16.2%/28.7% during 1990–2000<sup>33</sup>) and a sudden advent of aging society in Korea (it took 115 years in France, 24 years in Japan but only 18 years in Korea for the proportion of elders or those aging 65 years or older to reach 0.14 (aged society) from 0.07 (aging society)<sup>9,34</sup>). Midst these dramatic social transformations, however, social protection for women and 'unprepared' elders still remains much lower in Korea than in other advanced nations including Japan.<sup>9,34,35</sup> Korean women still suffer from their low insecurity in workplace and their excessive housework in traditional gender roles<sup>35</sup> while Korean elders are directly exposed to relative poverty, i.e. the share of elderly

households whose incomes are below the half of the average household income was 0.45 in Korea but 0.22 in Japan and 0.13 in the OECD average for Y2008.<sup>9,34</sup> Such gaps between social change and policy response might explain more common suicide and depression among women and elders in contemporary Korea than other advanced nations such as Japan (e.g. the elder's suicide rate for Year 2006 was greater in Korea than in Japan by more than 100%, while the ratio of women's age-standardized suicide rate to men's was 0.47 in Korea and 0.42 in Japan for the same year).<sup>9</sup> Policy measures for women's greater access to high-quality employment and childcare might be crucial for their psychological well-being in Korea given their over-representation in irregular service industry.<sup>33,36</sup> Also, a steady extension of pension eligibility beyond the age of 65 and a continued expansion of social expenditure for elderly might be a priority for Korea's government given that public social expenditure for elderly constituted only 1.7% of GDP in Korea for Y2007, only a quarter of the OECD average for the same year.<sup>34,36</sup> Without these health and welfare policy reactions to the rapid demographic and socio-economic changes in Korea, 'a nation of the economic miracle' will transform into 'a nation of the social crisis plagued with suicide and depression'. Korea's such experience might present good lessons and important health and welfare policy implications for all nations striving for rapid economic growth, whether they are in Africa, America, Asia, Europe or Oceania.

### Limitations of this study

First, some diseases were excluded for the low quality of their prevalence data (e.g. asthma), while prevalence data were missing and estimated for certain diseases in certain years (e.g. for renal failure during 2003–05 and during 2007–10). More complete prevalence data might lead to a more accurate estimation for the burden of disease. Secondly, a comparative analysis of Korea and more other nations might bring richer insight regarding the burden of disease. Thirdly, the extension of this research into main risk factors in Korea is expected to further the horizon of knowledge on the burden of disease. In spite of these limitations, however, this work constructs rich data on and presents a rare comparative examination of disease burden in Korea, a nation with the most rapid demographic, socioeconomic, behavioral and technological transformations in the past four decades.

### Funding

This work was supported by the Korean Foundation for Cancer Research [CB-2011-01-01].



## References

- Jung KW, Park SH, Kong HJ *et al.* Cancer statistics in Korea: incidence, mortality, survival and prevalence in 2008. *Cancer Res Treat* 2011;**43**:1–11.
- Kim DJ. The epidemiology of diabetes in Korea. *Diabet Metab J* 2011;**35**:303–308.
- World Bank. World development report 1993. New York: Oxford University Press, 1993.
- Mathers CD, Vos T, Lopez AD *et al.* (eds). National burden of disease studies: a practical guide, 2nd edn. Geneva: World Health Organization, 2001.
- Korea Ministry of Health and Welfare. Korean burden of disease in 2002. Seoul: KMHW, 2003.
- Yoon SJ, Bae SC, Lee SI *et al.* Measuring the burden of disease in Korea. *J Korean Med Sci* 2007;**22**:518–23.
- Oh IH, Yoon SJ, Kim EJ. The burden of disease in Korea. *J Korean Med Assoc* 2011;**54**:646–52.
- Cho MJ, Lee JY, Kim BS *et al.* Prevalence of the major mental disorders among the Korean elderly. *J Korean Med Sci* 2011;**26**:1–10.
- Kim SY, Kim MH, Kawachi I *et al.* Comparative epidemiology of suicide in South Korea and Japan: effects of age, gender and suicide methods. *Crisis* 2011;**32**:5–14.
- Barendregt JJ, Oortmarssen GJV, Hout BAV *et al.* Coping with multiple morbidity in a life table. *Math Popul Stud* 1998;**7**:29–49.
- Kruijshaar M, Barendregt JJ, Poll-Franse LVVD. Estimating the prevalence of breast cancer using a disease model: data problems and trends. *Popul Health Metrics* 2003;**1**:5.
- Barendregt JJ, Oortmarssen GJV, Vos T *et al.* A generic model for the assessment of disease epidemiology: the computational basis of DisModII. *Popul Health Metrics* 2003;**1**:4.
- Park JH, Lee KS, Choi KS. Burden of cancer in Korea during 2000–2020. *Cancer Epidemiology* 2013, <http://dx.doi.org/10.1016/j.canep.2013.03.015> (30 May 2013, date last accessed).
- Begg S, Vos T, Barker B *et al.* The burden of disease and injury in Australia 2003. PHE 82. Canberra: Australian Institute of Health and Welfare, 2007.
- Genova-Maleras R, Alvarez-Martin E, Morant-Ginestar C *et al.* Measuring the burden of disease and injury in Spain using disability-adjusted life years: an updated and policy-oriented overview. *Public Health* 2012;**126**:1024–1031.
- Mathers C, Boerma T, Ma Fat D. The global burden of disease: 2004 update. Geneva: World Health Organization, 2008.
- Korea Ministry of Health and Welfare. Korea health statistics 2001, 2005, 2007–2010: Korea National Health and Nutrition Examination Survey. Seoul: KMHW, 2001, 2005, 2007–2010. <http://knhanes.cdc.go.kr/knhanes/index.do> (19 July 2012, date last accessed).
- Cho MJ. The epidemiological survey of psychiatric illnesses in Korea. Seoul: Korea Ministry of Health and Welfare, 2006.
- Cho MJ. The epidemiological survey of mental disorders in Korea. Seoul: Korea Ministry of Health and Welfare, 2011.
- Cho MJ. Nationwide study on the prevalence of dementia in Korean elders. Seoul: Korea Ministry of Health and Welfare, 2008.
- World Health Organization. Global burden of disease concept. [http://www.who.int/quantifying\\_chimpacts/publications/en/9241546204chap3.pdf](http://www.who.int/quantifying_chimpacts/publications/en/9241546204chap3.pdf) (19 July 2012, date last accessed).
- Statistics Korea. Korean statistical information service: population (estimated population, life table), welfare (causes of death, cancer registry). [http://kosis.kr/abroad/abroad\\_01List.jsp](http://kosis.kr/abroad/abroad_01List.jsp) (19 July 2012, date last accessed).
- Congdon P. A multilevel model for cardiovascular disease prevalence in the US and its application to micro area prevalence estimates. *Int J Health Geogr* 2009;**8**:6.
- Do YK, Yoon SJ, Lee JK *et al.* Disability weights for the Korean burden of disease study: focused on comparison with disability weights in the Australian burden of disease study. *Korean J Prev Med* 2004;**37**:59–71.
- World Bank. World development indicators. <http://databank.worldbank.org/ddp/home.do> (19 July 2012, date last accessed).
- United Nations. World population ageing 2009. New York: United Nations Department of Economic and Social Affairs, 2009.
- Lee SK, Sobal J. Socio-economic, dietary, activity, nutrition and body weight transitions in South Korea. *Public Health Nutr* 2003;**6**:665–674.
- Kang MJ, Joung HJ, Lim JH *et al.* Secular trend in dietary patterns in a Korean adult population, using the 1998, 2001, and 2005 Korean National Health and Nutrition Examination Survey. *Korean J Nutr* 2011;**44**:152–161.
- Jeong GT, Ha BC. 2020 vision and strategy of health service industry in Korea. Korea Institute for Industrial Economics and Trade Policy Report 2007-66. Seoul: Korea Institute for Industrial Economics and Trade Policy, 2007.
- Song IH, Kim KS. Current status of liver diseases in Korea: hepatocellular carcinoma. *Korean J Hepatol* 2009;**15**(Suppl. 6):S50–S59.
- World Health Organization. WHO global status report on alcohol and health. Geneva: WHO Press, 2011.
- Organisation for Economic Cooperation and Development. OECD factbook: economic, environmental and social statistics. Paris: OECD, 2011.
- Peng I. The good, the bad and the confusing: the political economy of social care expansion in South Korea. *Dev Change* 2011;**42**:905–923.
- Stephen EH. Bracing for low fertility and a large elderly population in South Korea. Korea Economic Institute Academic Paper Series 51. [http://www.keia.org/publications?pcat=421&%3Bauthors=All&%3Btitle=&%3Bitems\\_per\\_page=60](http://www.keia.org/publications?pcat=421&%3Bauthors=All&%3Btitle=&%3Bitems_per_page=60) (20 November 2012, date last accessed).
- Oshio T, Nozaki K, Kobayashi M. Division of household labor and marital satisfaction in China, Japan, and Korea. Hitotsubashi University Project on International Equity Discussion Papers 502. Kunitachi: Hitotsubashi University Press, 2011.
- Organisation for Economic Cooperation and Development. A framework for growth and social cohesion in Korea. Paris: OECD, 2011.
- Korea Center for Disease Control. Annual report on the notified tuberculosis patients in Korea, 2000–2010. Osong: KCDC, 2000–2010.

- 38 Korea Health Insurance Corporation. Korea health insurance statistical yearbook, 2000–2010. Seoul: KHIC, 2000–2010. <http://www.nhic.or.kr/portal/site/main/menuitem.74b68c0b767ded38b31148b4062310a0/> (19 July 2012, date last accessed).
- 39 Seo WK, Koh SB, Kim BJ *et al.* Prevalence of Parkinson's disease in Korea. *J Clin Neurosci* 2007;**14**:1155–57.
- 40 Kim NH, Kim HJ, Cheong HK *et al.* Prevalence of multiple sclerosis in Korea. *Neurology* 2010;**75**:1432–38.
- 41 Lee SY, Jung KY, Lee IK *et al.* Prevalence of treated epilepsy in Korea based on national health insurance data. *J Korean Med Sci* 2012;**27**:285–90.
- 42 Yoon KC, Mun GH, Kim SD *et al.* Prevalence of eye diseases in South Korea. *Korean J Ophthalmol* 2011;**25**:421–33.
- 43 Kim SG, Lim CS, Han DC *et al.* The prevalence of chronic kidney disease (CKD) and the associated factors to CKD in urban Korea: a population-based cross-sectional epidemiologic study. *J Korean Med Sci* 2009;**24**:S11–21.
